# Supplementary material
Source: Research Square preprint supplement (doi:10.21203/rs.3.rs-9538324/v1)

**Appendix**Ethical Approval Form


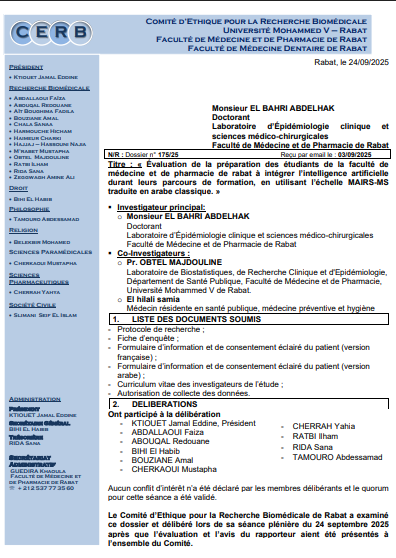


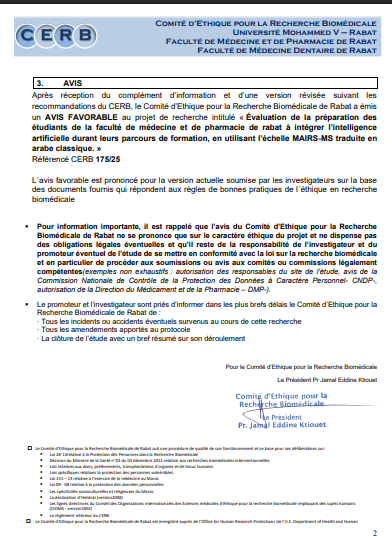

Supplement: Supplementary file 1 [file a2693efe854bddaa92d6016f.docx]
